# Supplementary material for: Distorted cubic tetranuclear vanadium(iv) phosphonate cages: double-four-ring (D4R) containing transition metal ion phosphonate cages
Source: Royal Society of Chemistry journal article supplement (doi:10.1039/c1dt11347j), 2011-11-10
Supplement: c1dt11347j.pdf [file c1dt11347j.pdf]

## **Electronic Supplementary Information**

**Distorted Cubic Tetranuclear Vanadium(IV) Phosphonate Cages :**

**Double-Four-Ring (D4R) Containing Transition Metal ion**

**Phosphonate cages**

**Vadapalli Chandrasekhar,<sup>\*,a</sup> Atanu Dey,<sup>a</sup> Tapas Senapati,<sup>a</sup> and E. Carolina Sañudo<sup>\*,b</sup>**

*<sup>a</sup>Department of Chemistry, Indian Institute of Technology Kanpur, Kanpur-208016, India, and*

*<sup>b</sup>Departament de Química Inorgànica i Institut de Nanociència i Nanotecnologia, Universitat de Barcelona, Diagonal 647, 08028 Barcelona, SPAIN*

AUTHOR EMAIL ADDRESS: [vc@iitk.ac.in](mailto:vc@iitk.ac.in)

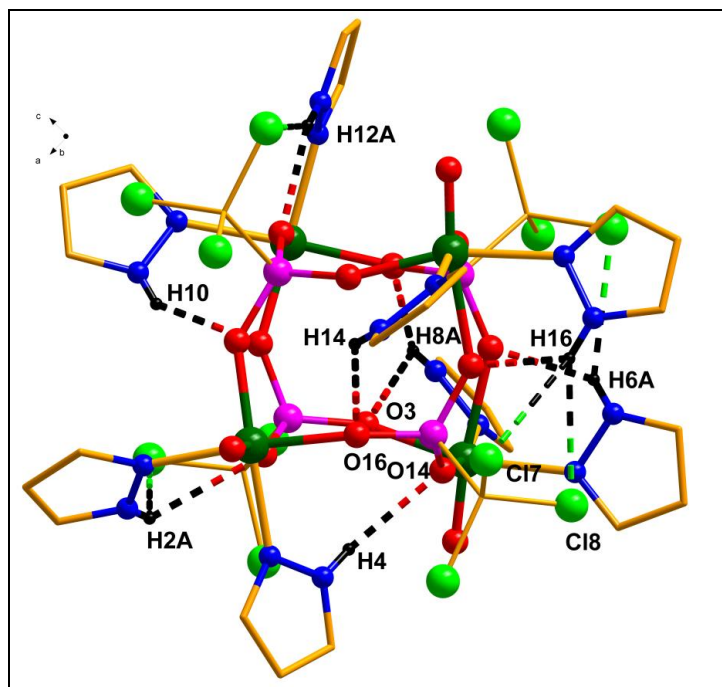

**Fig. S1** Intramolecular hydrogen-bonding in 1.

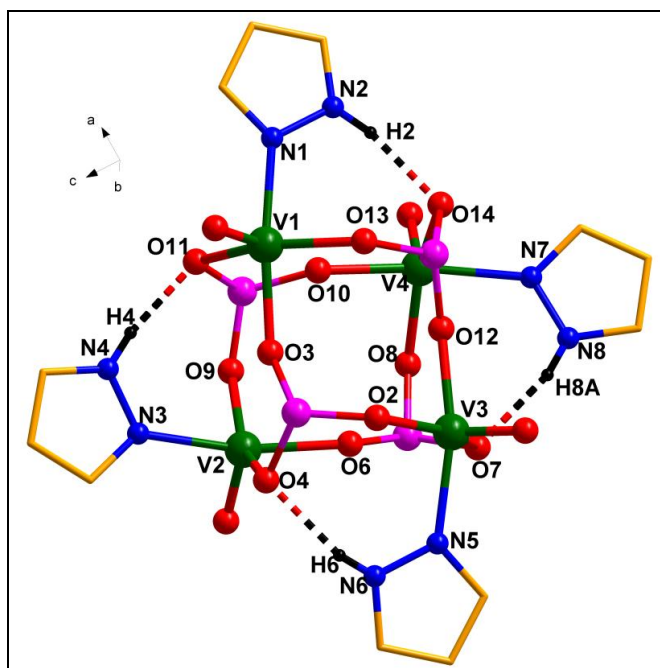

**Fig. S2** Intramolecular hydrogen-bonding in 2.

**Table S1** Hydrogen bond parameters of **1**.

| D-H---A          | d(D-H) | d(H---A) | <DHA   | d(D-A) |
|------------------|--------|----------|--------|--------|
| N4-H4---- O14    | 0.860  | 2.301    | 144.10 | 3.040  |
| N10-H10---- O4   | 0.860  | 2.189    | 117.65 | 2.698  |
| N14-H14----O12   | 0.860  | 2.226    | 110.91 | 2.658  |
| N14-H14----O16   | 0.860  | 2.402    | 139.95 | 3.109  |
| N16-H16----O15   | 0.860  | 2.162    | 117.54 | 2.671  |
| N16-H16----Cl8   | 0.860  | 2.860    | 145.80 | 3.604  |
| N16-H16----Cl7   | 0.860  | 2.929    | 149.67 | 3.697  |
| N2-H2A----O2     | 0.860  | 2.390    | 111.23 | 2.818  |
| N2-H2A----Cl1    | 0.860  | 2.840    | 111.05 | 3.249  |
| N6-H6A----O6     | 0.860  | 2.078    | 123.15 | 2.648  |
| N6-H6A----Cl5    | 0.860  | 2.710    | 153.24 | 3.500  |
| N8-H8A----O8     | 0.860  | 2.199    | 152.48 | 2.988  |
| N8-H8A----O3     | 0.860  | 2.322    | 113.96 | 2.735  |
| N12-H12A----O10  | 0.860  | 2.152    | 120.72 | 2.694  |
| N12-H12A----Cl11 | 0.860  | 2.775    | 156.10 | 3.579  |

**Table S2** Hydrogen bond parameters of **2**.

| D-H---A        | d(D-H) | d(H---A) | <DHA   | d(D-A) |
|----------------|--------|----------|--------|--------|
| N2-H2----- O14 | 0.860  | 1.919    | 160.18 | 2.743  |
| N4-H4----- O11 | 0.860  | 1.895    | 163.15 | 2.729  |
| N6-H6----- O4  | 0.860  | 1.907    | 158.28 | 2.724  |
| N8-H8A---- O7  | 0.860  | 1.957    | 160.10 | 2.781  |

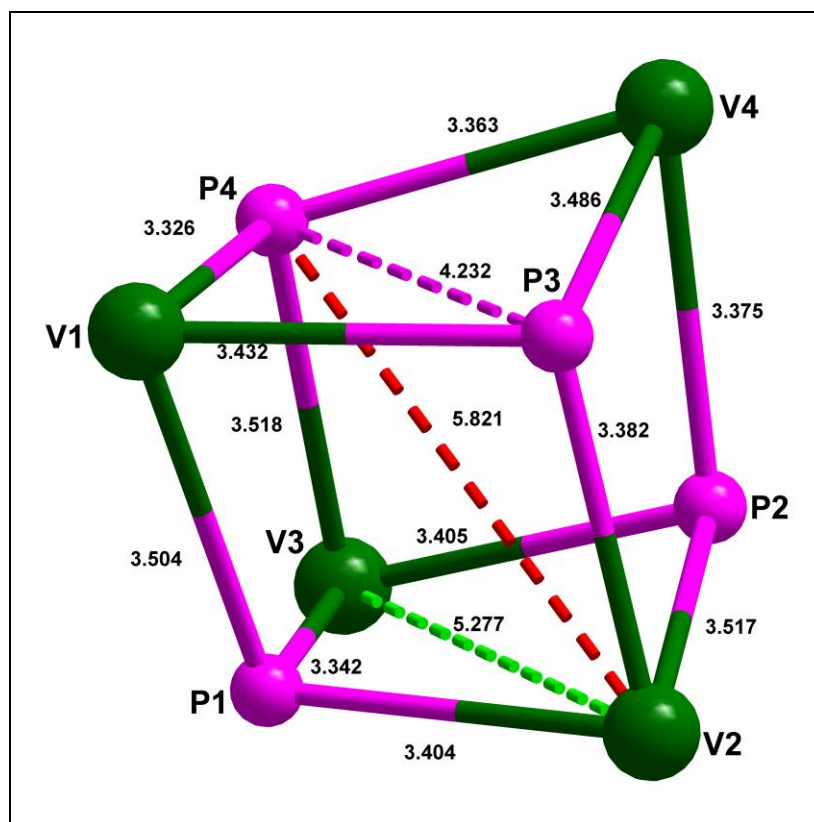

**Fig. S3** Distorted cubane core of **1**. Edges and diagonal distances ( $\text{\AA}$ ) are given in the figure. Bond angles (deg): V1-P1-V2 100.202(25); V1-P1-V3 106.854(25); V2-P2-V4 105.144(28); V2-P2-V3 99.328(27); V1-P3-V2 102.105(26); V1-P3-V4 98.343(28); V4-P4-V1 102.989(29); V4-P4-V3 99.515(26); P1-V1-P4 72.639(22); P1-V1-P3 75.419(22); P1-V2-P2 75.258(25); P1-V2-P3 77.406(24); P2-V4-P4 78.318(24); P2-V4-P3 74.379(24); P4-V3-P2 75.835(24); P4-V3-P1 72.274(23).

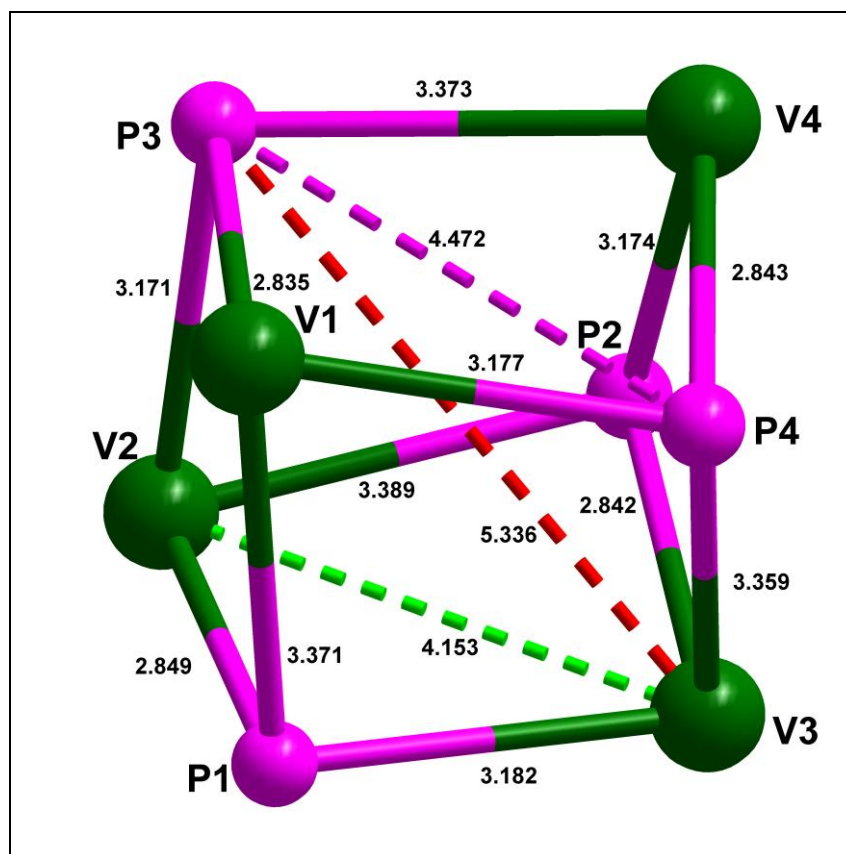

**Fig. S4** Distorted cubane core of **2**. Edges and diagonal distances ( $\text{\AA}$ ) are given in the figure.

Bond angles (deg): V2-P1-V3 86.866(28); V2-P1-V1 83.719(27); V4-P2-V3 87.293(28); V4-P2-V2 98.009(28); V2-P3-V4 98.395(28); V2-P3-V1 87.727(29); V4-P4-V3 83.782(27); V4-P4-V1 86.747(28); P3-V1-P4 95.948(29); P3-V1-P1 91.279(28); P3-V2-P1 95.255(29); P1-V2-P2 91.562(28); P1-V3-P4 77.669(26); P2-V3-P1 96.113(29); P2-V3-P4 91.524(28); P4-V4-P3 91.616(28); P4-V4-P2 95.451(29); P3-V4-P2 78.310(26).

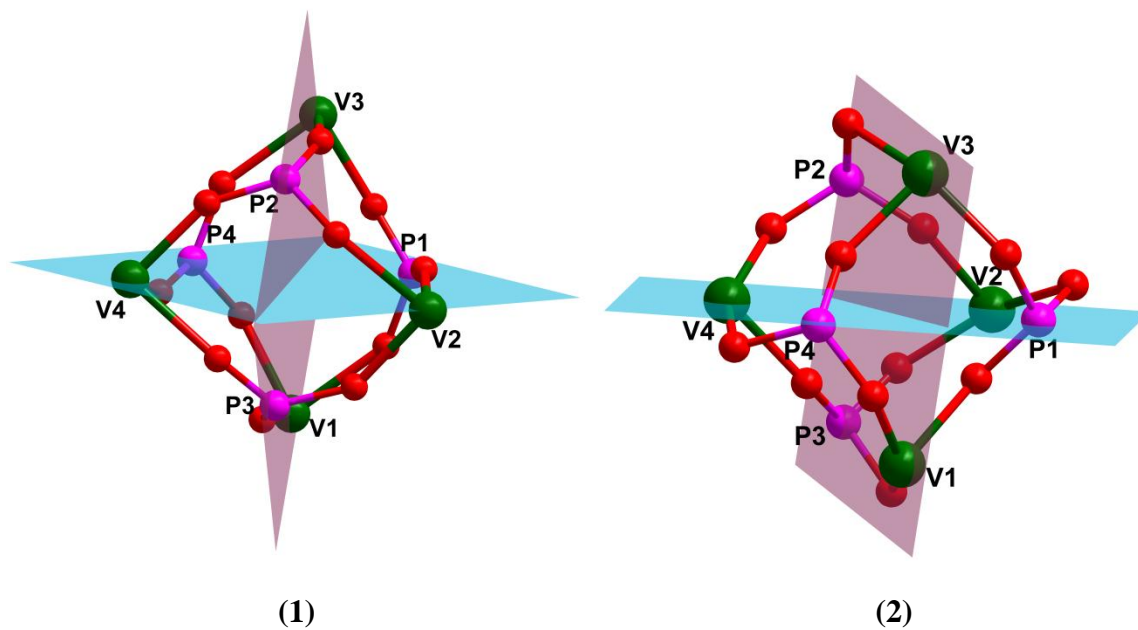

**Fig. S5** Representation of the two dinuclear segments of complexes **1** and **2**. The angle between two  $V_2P_2$  plane is  $89.374(11)^\circ$  (**1**) and  $89.855(11)^\circ$  (**2**).

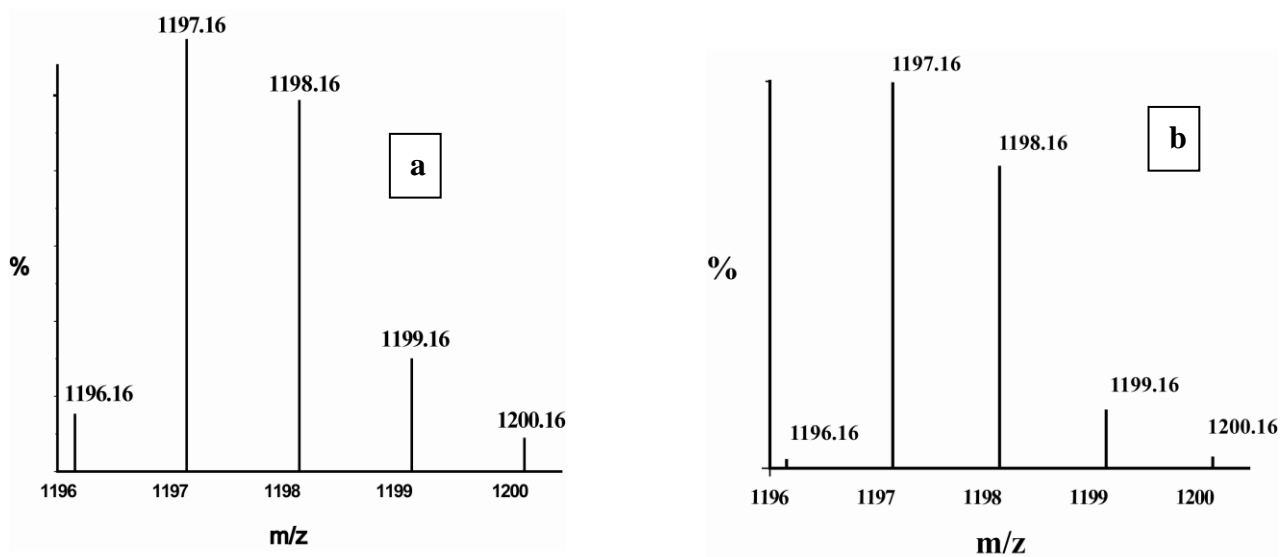

**Fig. S6** (a) ESI-MS spectrum of complex **2**, (b) simulated isotopic pattern.

**Table S3.** Bond Lengths [Å] and Angles [deg] for **1**.

| Bond Lengths/Å or Bond Angles/deg |            |                 |            |                  |            |             |          |
|-----------------------------------|------------|-----------------|------------|------------------|------------|-------------|----------|
| N(1)-V(1)                         | 2.126(3)   | N(5)-V(2)       | 2.141(3)   | N(9)-V(3)        | 2.148(3)   | N(13)-V(4)  | 2.143(3) |
| N(3)-V(1)                         | 2.132(3)   | N(7)-V(2)       | 2.140(3)   | N(11)-V(3)       | 2.113(3)   | N(15)-V(4)  | 2.143(3) |
| O(1)-V(1)                         | 1.602(2)   | O(3)-V(2)       | 1.982(2)   | O(4)-V(3)        | 2.005(2)   | O(7)-V(4)   | 1.973(2) |
| O(2)-V(1)                         | 2.157(2)   | O(5)-V(2)       | 1.597(2)   | O(8)-V(3)        | 2.014(2)   | O(12)-V(4)  | 1.978(2) |
| O(11)-V(1)                        | 2.015(2)   | O(6)-V(2)       | 2.187(2)   | O(9)-V(3)        | 1.594(2)   | O(13)-V(4)  | 1.590(2) |
| O(16)-V(1)                        | 2.020(2)   | O(14)-V(2)      | 2.007(2)   | O(10)-V(3)       | 2.168(2)   | O(15)-V(4)  | 2.192(2) |
| O(2)-P(1)                         | 1.499(2)   | O(10)-P(4)      | 1.495(2)   | N(13)-N(14)      | 1.359(4)   | N(16)-H(16) | 0.86     |
| O(3)-P(1)                         | 1.502(2)   | O(11)-P(4)      | 1.516(2)   | N(15)-N(16)      | 1.363(4)   |             |          |
| O(4)-P(1)                         | 1.508(2)   | O(12)-P(4)      | 1.507(2)   | N(2)-H(2A)       | 0.86       |             |          |
| O(6)-P(2)                         | 1.502(2)   | N(1)-N(2)       | 1.365(4)   | N(4)-H(4)        | 0.86       |             |          |
| O(7)-P(2)                         | 1.499(2)   | N(3)-N(4)       | 1.367(4)   | N(6)-H(6A)       | 0.86       |             |          |
| O(8)-P(2)                         | 1.514(2)   | N(5)-N(6)       | 1.349(4)   | N(8)-H(8A)       | 0.86       |             |          |
| O(14)-P(3)                        | 1.511(2)   | N(7)-N(8)       | 1.362(4)   | N(10)-H(10)      | 0.86       |             |          |
| O(15)-P(3)                        | 1.492(2)   | N(9)-N(10)      | 1.344(4)   | N(12)-H(12A)     | 0.86       |             |          |
| O(16)-P(3)                        | 1.508(2)   | N(11)-N(12)     | 1.347(4)   | N(14)-H(14)      | 0.86       |             |          |
| O(1)-V(1)-O(11)                   | 102.56(10) | O(14)-V(2)-N(7) | 167.02(10) | O(9)-V(3)-O(10)  | 171.34(10) |             |          |
| O(1)-V(1)-O(16)                   | 94.21(11)  | O(5)-V(2)-N(5)  | 93.33(11)  | O(4)-V(3)-O(10)  | 83.82(9)   |             |          |
| O(11)-V(1)-O(16)                  | 93.71(9)   | O(3)-V(2)-N(5)  | 165.85(10) | O(8)-V(3)-O(10)  | 91.46(9)   |             |          |
| O(1)-V(1)-N(1)                    | 91.73(11)  | O(14)-V(2)-N(5) | 88.96(10)  | N(11)-V(3)-O(10) | 82.39(10)  |             |          |
| O(11)-V(1)-N(1)                   | 89.72(10)  | N(7)-V(2)-N(5)  | 96.55(11)  | N(9)-V(3)-O(10)  | 79.05(10)  |             |          |
| O(16)-V(1)-N(1)                   | 172.33(10) | O(5)-V(2)-O(6)  | 171.24(11) | O(13)-V(4)-O(7)  | 98.43(12)  |             |          |
| O(1)-V(1)-N(3)                    | 96.79(11)  | O(3)-V(2)-O(6)  | 84.72(9)   | O(13)-V(4)-O(12) | 102.71(11) |             |          |
| O(11)-V(1)-N(3)                   | 160.51(10) | O(14)-V(2)-O(6) | 88.74(9)   | O(7)-V(4)-O(12)  | 91.12(10)  |             |          |
| O(16)-V(1)-N(3)                   | 87.16(10)  | N(7)-V(2)-O(6)  | 80.52(10)  | O(13)-V(4)-N(13) | 94.11(12)  |             |          |
| N(1)-V(1)-N(3)                    | 87.33(11)  | N(5)-V(2)-O(6)  | 81.34(10)  | O(7)-V(4)-N(13)  | 166.53(11) |             |          |
| O(1)-V(1)-O(2)                    | 170.78(11) | O(9)-V(3)-O(4)  | 99.51(11)  | O(12)-V(4)-N(13) | 81.29(10)  |             |          |
| O(11)-V(1)-O(2)                   | 83.34(9)   | O(9)-V(3)-O(8)  | 96.36(10)  | O(13)-V(4)-N(15) | 91.90(12)  |             |          |
| O(16)-V(1)-O(2)                   | 92.45(9)   | O(4)-V(3)-O(8)  | 92.48(9)   | O(7)-V(4)-N(15)  | 93.52(10)  |             |          |
| N(1)-V(1)-O(2)                    | 81.13(10)  | O(9)-V(3)-N(11) | 94.21(12)  | O(12)-V(4)-N(15) | 163.85(10) |             |          |
| N(3)-V(1)-O(2)                    | 77.17(10)  | O(4)-V(3)-N(11) | 166.20(11) | N(13)-V(4)-N(15) | 90.96(11)  |             |          |

O(5)-V(2)-O(3) 100.80(11) O(8)-V(3)-N(11) 87.41(10) O(13)-V(4)-O(15) 170.31(11)  
 O(5)-V(2)-O(14) 98.15(11) O(9)-V(3)-N(9) 93.30(11) O(7)-V(4)-O(15) 85.36(9)  
 O(3)-V(2)-O(14) 88.34(9) O(4)-V(3)-N(9) 83.86(10) O(12)-V(4)-O(15) 86.06(9)  
 O(5)-V(2)-N(7) 93.27(11) O(8)-V(3)-N(9) 170.13(10) N(13)-V(4)-O(15) 83.05(10)  
 O(3)-V(2)-N(7) 83.46(10) N(11)-V(3)-N(9) 93.96(11) N(15)-V(4)-O(15) 78.92(10)

P(1)-O(2)-V(1) 146.21(14) P(3)-O(14)-V(2) 147.71(14)  
 P(1)-O(3)-V(2) 155.01(15) P(3)-O(15)-V(4) 141.48(13)  
 P(1)-O(4)-V(3) 143.71(14) P(3)-O(16)-V(1) 152.91(15)  
 P(2)-O(6)-V(2) 144.17(14) P(4)-O(10)-V(3) 147.03(14)  
 P(2)-O(7)-V(4) 152.64(15) P(4)-O(11)-V(1) 140.41(14)  
 P(2)-O(8)-V(3) 149.32(14) P(4)-O(12)-V(4) 149.31(15)

**Table S4** Bond Lengths [ $\text{\AA}$ ] and Angles [deg] for **2**.

| Bond Lengths/ $\text{\AA}$ or Bond Angles/deg |           |                |            |                 |           |            |          |
|-----------------------------------------------|-----------|----------------|------------|-----------------|-----------|------------|----------|
| N(1)-V(1)                                     | 2.116(3)  | N(3)-V(2)      | 2.119(3)   | N(5)-V(3)       | 2.115(3)  | N(7)-V(4)  | 2.116(3) |
| O(13)-V(1)                                    | 1.960(2)  | O(4)-V(2)      | 2.019(2)   | O(2)-V(3)       | 1.969(2)  | O(14)-V(4) | 2.019(2) |
| O(1)-V(1)                                     | 1.589(2)  | O(5)-V(2)      | 1.584(2)   | O(7)-V(3)       | 2.021(2)  | O(16)-V(4) | 1.581(2) |
| O(3)-V(1)                                     | 2.027(2)  | O(6)-V(2)      | 2.029(2)   | O(12)-V(3)      | 2.020(2)  | O(8)-V(4)  | 1.961(2) |
| O(11)-V(1)                                    | 2.015(2)  | O(9)-V(2)      | 1.960(2)   | O(15)-V(3)      | 1.584(2)  | O(10)-V(4) | 2.028(2) |
| O(2)-P(1)                                     | 1.523(2)  | O(11)-P(3)     | 1.552(2)   | N(1)-N(2)       | 1.360(4)  |            |          |
| O(3)-P(1)                                     | 1.534(2)  | O(9)-P(3)      | 1.519(2)   | N(3)-N(4)       | 1.346(3)  |            |          |
| O(4)-P(1)                                     | 1.553(2)  | O(10)-P(3)     | 1.537(2)   | N(7)-N(8)       | 1.356(3)  |            |          |
| O(6)-P(2)                                     | 1.546(2)  | O(13)-P(4)     | 1.521(2)   | N(5)-N(6)       | 1.360(4)  |            |          |
| O(7)-P(2)                                     | 1.546(2)  | O(14)-P(4)     | 1.550(2)   |                 |           |            |          |
| O(8)-P(2)                                     | 1.522(2)  | O(12)-P(4)     | 1.539(2)   |                 |           |            |          |
| O(13)-V(1)-O(11)                              | 148.73(9) | O(4)-V(2)-N(3) | 85.81(10)  | O(8)-V(4)-N(7)  | 89.67(10) |            |          |
| O(13)-V(1)-O(3)                               | 88.43(9)  | O(6)-V(2)-N(3) | 163.67(10) | O(14)-V(4)-N(7) | 86.51(10) |            |          |



|                 |            |                  |            |                 |            |
|-----------------|------------|------------------|------------|-----------------|------------|
| O(11)-V(1)-O(3) | 85.20(9)   | O(2)-V(3)-O(12)  | 89.03(9)   | O(10)-V(4)-N(7) | 165.13(10) |
| O(13)-V(1)-N(1) | 90.36(10)  | O(2)-V(3)-O(7)   | 148.79(9)  |                 |            |
| O(11)-V(1)-N(1) | 87.62(10)  | O(12)-V(3)-O(7)  | 84.76(9)   |                 |            |
| O(3)-V(1)-N(1)  | 164.07(10) | O(2)-V(3)-N(5)   | 90.16(10)  |                 |            |
| O(5)-V(2)-O(9)  | 107.76(11) | O(12)-V(3)-N(5)  | 163.08(10) |                 |            |
| O(5)-V(2)-O(4)  | 104.41(11) | O(7)-V(3)-N(5)   | 87.21(10)  |                 |            |
| O(9)-V(2)-O(4)  | 147.81(9)  | O(8)-V(4)-O(14)  | 147.97(9)  |                 |            |
| O(9)-V(2)-O(6)  | 89.34(9)   | O(8)-V(4)-O(10)  | 89.64(9)   |                 |            |
| O(4)-V(2)-O(6)  | 85.96(9)   | O(14)-V(4)-O(10) | 86.21(9)   |                 |            |
| O(9)-V(2)-N(3)  | 90.15(10)  |                  |            |                 |            |
| P(1)-O(2)-V(3)  | 130.90(13) | P(3)-O(9)-V(2)   | 130.92(13) |                 |            |
| P(1)-O(3)-V(1)  | 141.91(14) | P(3)-O(10)-V(4)  | 141.84(14) |                 |            |
| P(1)-O(4)-V(2)  | 105.09(12) | P(3)-O(11)-V(1)  | 104.56(12) |                 |            |
| P(2)-O(6)-V(2)  | 142.52(14) | P(4)-O(12)-V(3)  | 141.03(14) |                 |            |
| P(2)-O(7)-V(3)  | 104.87(11) | P(4)-O(13)-V(1)  | 131.39(14) |                 |            |
| P(2)-O(8)-V(4)  | 130.87(14) | P(4)-O(14)-V(4)  | 104.87(12) |                 |            |

---
